# Supplementary material for: Stocking density-induced changes in growth performance, blood parameters, meat quality traits, and welfare of broiler chickens reared under semi-arid subtropical conditions
Source: PubMed Central journal article supplement (PMC9560488; doi:10.1371/journal.pone.0275811), 2022-10-13
Supplement: pone.0275811.s001.pdf [file pone.0275811.s001.pdf]

- 1 **S1 Table. Chemical composition and digestible amino acids in starter, grower, and**  
 2 **finisher diets used for feeding broilers.**

| <b>Parameters</b>            | <b>Starter phase</b> | <b>Grower phase</b> | <b>Finisher phase</b> |
|------------------------------|----------------------|---------------------|-----------------------|
| Metabolisable energy (MJ/Kg) | 10.1                 | 9.8                 | 9.9                   |
| Organic matter (%)           | 82.0                 | 82.2                | 82.6                  |
| Dry matter (%)               | 87.7                 | 86.6                | 86.6                  |
| Crude protein (%)            | 18.2                 | 16.8                | 15.4                  |
| Crude fibre (%)              | 6.11                 | 0.36                | 5.14                  |
| Crude fat (%)                | 3.26                 | 3.36                | 3.42                  |
| Sodium (%)                   | 0.14                 | 0.14                | 0.14                  |
| Calcium (%)                  | 0.84                 | 0.73                | 0.66                  |
| Chloride (%)                 | 0.25                 | 0.25                | 0.25                  |
| Digestible methionine (%)    | 0.41                 | 0.44                | 0.51                  |
| Digestible lysine (%)        | 0.76                 | 0.85                | 0.98                  |
| Digestible tryptophan (%)    | 0.12                 | 0.14                | 0.15                  |
| Digestible threonine (%)     | 0.54                 | 0.58                | 0.68                  |
| Digestible isoleucine (%)    | 0.5                  | 0.55                | 0.6                   |
| Digestible arginine (%)      | 0.75                 | 0.83                | 0.91                  |

3
